# Supplementary material for: Developing new lines of Japonica rice for higher quality and yield under arid conditions
Source: PeerJ. 2021 Jun 14;9:e11592. doi: 10.7717/peerj.11592 (PMC8210806; doi:10.7717/peerj.11592)
Supplement: Supplemental Information 1 — Three replications for the studied traits per sheet. [file peerj-09-11592-s001.xlsx]

## Sheet: Hulling%
Genotypes	R1	R2	R3	Total	Mean
1	80.34	80.29	80.37	241	80.3333
2	79.03	78.98	79.06	237.07	79.0233
3	81.36	81.31	81.39	244.06	81.3533
4	79.03	78.98	79.06	237.07	79.0233
5	83.7	83.65	83.73	251.08	83.6933
6	83.7	83.65	83.73	251.08	83.6933
7	83.7	83.65	83.73	251.08	83.6933
8	81.36	81.31	81.39	244.06	81.3533
9	81.36	81.31	81.39	244.06	81.3533
10	84.36	90.92	91	266.28	88.76
11	83.7	83.65	83.73	251.08	83.6933
12	79.03	78.98	79.06	237.07	79.0233
13	82.47	82.92	83	248.39	82.7967
14	80.56	80.51	80.59	241.66	80.5533
15	80.36	80.31	80.39	241.06	80.3533
16	80.36	80.31	80.39	241.06	80.3533
17	83.7	83.65	83.73	251.08	83.6933
18	80.36	80.31	80.39	241.06	80.3533
19	83.69	83.64	83.72	251.05	83.6833
20	74.12	74.07	74.15	222.34	74.1133
21	79.33	79.28	79.36	237.97	79.3233
22	79.7	79.65	79.73	239.08	79.6933
23	83.36	83.31	83.39	250.06	83.3533
24	79.56	79.51	79.59	238.66	79.5533
25	80.36	80.31	80.39	241.06	80.3533
26	83.7	83.65	83.73	251.08	83.6933
27	80.91	81.92	82	244.83	81.61
28	80.36	80.31	80.39	241.06	80.3533
29	83.7	83.65	83.73	251.08	83.6933
30	82.03	81.98	82.06	246.07	82.0233
31	78.03	77.98	78.06	234.07	78.0233
32	80.36	80.31	80.39	241.06	80.3533
33	80.36	80.31	80.39	241.06	80.3533
34	80.36	80.31	80.39	241.06	80.3533
35	80.36	80.43	80.39	241.18	80.3933
36	80.7	80.77	80.73	242.2	80.7333
37	82.2	82.27	82.23	246.7	82.2333
38	83.7	83.77	83.73	251.2	83.7333
39	80.16	80.23	80.19	240.58	80.1933
40	80.08	80.15	80.11	240.34	80.1133
Total	3245.61	3252.5	3254.98	9753.09	3251.03

## Sheet: Milling%
Genotypes	R1	R2	R3	Total	Mean
1	73.74	73.95	73.76	221.45	73.8167
2	70.08	70.29	70.1	210.47	70.1567
3	73.75	73.96	73.77	221.48	73.8267
4	70.08	70.29	70.1	210.47	70.1567
5	72.85	73.06	74	219.91	73.3033
6	73.75	73.96	73.77	221.48	73.8267
7	71.08	71.29	71.1	213.47	71.1567
8	72.41	72.62	72.43	217.46	72.4867
9	74.75	74.96	74.77	224.48	74.8267
10	74.12	75	74.14	223.26	74.42
11	74.75	74.96	74.77	224.48	74.8267
12	70.08	70.29	70.1	210.47	70.1567
13	73.08	73.29	73.1	219.47	73.1567
14	72.62	72.83	71	216.45	72.15
15	74.75	74.96	74.77	224.48	74.8267
16	74.75	74.96	74.77	224.48	74.8267
17	74.75	74.96	74.77	224.48	74.8267
18	73.41	73.62	73.43	220.46	73.4867
19	72.23	70	72.25	214.48	71.4933
20	70.08	70.29	70.1	210.47	70.1567
21	69.73	69.94	69.75	209.42	69.8067
22	72.75	72.96	72.77	218.48	72.8267
23	73.41	73.62	73.43	220.46	73.4867
24	74.11	75	74.13	223.24	74.4133
25	66.75	66.96	66.77	200.48	66.8267
26	73.08	73.29	73.1	219.47	73.1567
27	66.75	66.96	66.77	200.48	66.8267
28	74.75	74.96	74.77	224.48	74.8267
29	73.41	73.62	73.43	220.46	73.4867
30	69.08	69.29	69.1	207.47	69.1567
31	60.08	60.29	60.1	180.47	60.1567
32	73.41	73.62	73.43	220.46	73.4867
33	70.08	70.29	70.1	210.47	70.1567
34	70.08	70.29	70.1	210.47	70.1567
35	70.41	70.62	70.43	211.46	70.4867
36	73.09	73.3	73.11	219.5	73.1667
37	71.75	71.96	71.77	215.48	71.8267
38	73.08	73.29	73.1	219.47	73.1567
39	71.41	71.62	71.43	214.46	71.4867
40	71.61	71.82	71.63	215.06	71.6867
Total	2875.93	2883.24	2876.22	8635.39	2878.46

## Sheet: Headrice%
Genotypes	R1	R2	R3	Total	Mean
1	59.99	60.11	59.85	179.95	59.9833
2	65.82	65.94	64	195.76	65.2533
3	69.99	70.11	69.85	209.95	69.9833
4	66.66	66.78	66.52	199.96	66.6533
5	66.66	66.78	66.52	199.96	66.6533
6	69.99	70.11	69.85	209.95	69.9833
7	71.04	71.16	74	216.2	72.0667
8	69.99	70.11	69.85	209.95	69.9833
9	69.99	70.11	69.85	209.95	69.9833
10	70.32	70.44	70.18	210.94	70.3133
11	69.99	70.11	69.85	209.95	69.9833
12	63.99	64.11	63.85	191.95	63.9833
13	72.65	72.77	72.51	217.93	72.6433
14	70.71	70.83	72	213.54	71.18
15	70.32	70.44	70.18	210.94	70.3133
16	66.66	66.78	66.52	199.96	66.6533
17	66.66	66.78	66.52	199.96	66.6533
18	52.26	52.38	50	154.64	51.5467
19	69.99	70.11	69.85	209.95	69.9833
20	66.66	66.78	66.52	199.96	66.6533
21	64.59	64.71	62	191.3	63.7667
22	68.65	68.77	68.51	205.93	68.6433
23	69.99	70.11	69.85	209.95	69.9833
24	71.32	71.44	71.18	213.94	71.3133
25	56.66	56.78	56.52	169.96	56.6533
26	71.32	71.44	71.18	213.94	71.3133
27	63.32	63.44	63.18	189.94	63.3133
28	71.32	71.44	71.18	213.94	71.3133
29	66.66	66.78	66.52	199.96	66.6533
30	65.99	66.11	65.85	197.95	65.9833
31	56.66	56.78	56.52	169.96	56.6533
32	63.32	63.44	63.18	189.94	63.3133
33	63.32	63.44	63.18	189.94	63.3133
34	59.99	60.11	59.85	179.95	59.9833
35	66.28	66.4	66.14	198.82	66.2733
36	69.66	69.78	69.52	208.96	69.6533
37	62.32	62.44	62.18	186.94	62.3133
38	66.66	66.78	66.52	199.96	66.6533
39	65.31	65.43	65.17	195.91	65.3033
40	64.66	64.78	64.52	193.96	64.6533
Total	2658.34	2663.14	2651.02	7972.5	2657.5

## Sheet: Amylose %
Genotypes	R1	R2	R3	Total	Mean
1	18	18.01	18	54.01	18.0033
2	20.22	20.21	20.21	60.64	20.2133
3	19.8	19.87	19.87	59.54	19.8467
4	20.78	20.5	20.6	61.88	20.6267
5	18.5	18.8	18.7	56	18.6667
6	18.5	18.89	18.78	56.17	18.7233
7	19.89	19.88	19.74	59.51	19.8367
8	17.09	17.2	16.94	51.23	17.0767
9	18.25	18.36	18.1	54.71	18.2367
10	20.14	20.25	19.99	60.38	20.1267
11	19.34	19.45	19.19	57.98	19.3267
12	19.5	19.61	19.49	58.6	19.5333
13	19.17	19.17	19.7	58.04	19.3467
14	18.4	18.4	18.4	55.2	18.4
15	18.72	18.83	18.57	56.12	18.7067
16	19	19.11	18.85	56.96	18.9867
17	18.08	18.19	17.93	54.2	18.0667
18	19	19.11	19.2	57.31	19.1033
19	18.35	18.34	18.34	55.03	18.3433
20	18.95	19.06	18.8	56.81	18.9367
21	18.85	18.96	18.7	56.51	18.8367
22	18.73	18.84	18.58	56.15	18.7167
23	18.82	18.93	18.67	56.42	18.8067
24	20.92	21.03	20.77	62.72	20.9067
25	19.35	19.46	19.2	58.01	19.3367
26	20.84	20.95	20.69	62.48	20.8267
27	18.9	19.01	18.89	56.8	18.9333
28	18.75	18.86	18.6	56.21	18.7367
29	20.07	20.18	19.92	60.17	20.0567
30	20.92	21.03	20.77	62.72	20.9067
31	19.89	20	19.74	59.63	19.8767
32	20.56	20.67	20.55	61.78	20.5933
33	19.63	19.74	19.58	58.95	19.65
34	18.32	18.43	18.17	54.92	18.3067
35	20.18	20.29	20.03	60.5	20.1667
36	18.45	18.56	18.3	55.31	18.4367
37	19.55	19.66	19.4	58.61	19.5367
38	18.78	18.89	18.63	56.3	18.7667
39	18	18.11	17.85	53.96	17.9867
40	18.3	18.41	18.15	54.86	18.2867
Total	767.49	771.25	764.59	2303.33	767.777

## Sheet: G T
Genotypes	R1	R2	R3	Total	Mean
1	7	6.97	7.02	20.99	6.99667
2	5	4.97	5.02	14.99	4.99667
3	5	4.97	5.02	14.99	4.99667
4	5.01	5	5.03	15.04	5.01333
5	6.01	6	6.03	18.04	6.01333
6	6.09	6.06	6.3	18.45	6.15
7	5.01	5	5.03	15.04	5.01333
8	6	5.97	6.02	17.99	5.99667
9	5.01	5	5.03	15.04	5.01333
10	6	5.97	6.02	17.99	5.99667
11	7.01	7	7.03	21.04	7.01333
12	4	3.97	4.02	11.99	3.99667
13	7	6.97	7.02	20.99	6.99667
14	7	6.97	7.02	20.99	6.99667
15	6.01	6	6.03	18.04	6.01333
16	6.01	6	6.03	18.04	6.01333
17	6.01	6	6.03	18.04	6.01333
18	6	5.97	6.02	17.99	5.99667
19	6	5.97	6.02	17.99	5.99667
20	5.01	5	5.03	15.04	5.01333
21	5	4.97	5.02	14.99	4.99667
22	6	5.97	6.02	17.99	5.99667
23	5	4.97	5.02	14.99	4.99667
24	6.01	6	6.03	18.04	6.01333
25	5.99	5.96	6	17.95	5.98333
26	5.99	5.96	6	17.95	5.98333
27	4.66	4.63	6	15.29	5.09667
28	6.03	6	6.1	18.13	6.04333
29	5.01	5	5.03	15.04	5.01333
30	6	5.97	6.02	17.99	5.99667
31	6.01	6	6.03	18.04	6.01333
32	7.01	7	7.03	21.04	7.01333
33	7	6.97	7.02	20.99	6.99667
34	6	5.97	6.02	17.99	5.99667
35	7	6.97	7.02	20.99	6.99667
36	7	6.97	7.02	20.99	6.99667
37	6	5.97	6.02	17.99	5.99667
38	7	6.97	7.02	20.99	6.99667
39	7	6.97	7.02	20.99	6.99667
40	7	6.97	7.02	20.99	6.99667
Total	238.89	237.95	241.23	718.07	239.357

## Sheet: Elongation
Genotypes	R1	R2	R3	Total	Mean
1	32.91	33	31	96.91	32.3033
2	17.43	19.87	14.19	51.49	17.1633
3	34.62	33.75	36.55	104.92	34.9733
4	39	42.85	41	122.85	40.95
5	28.84	28.13	27.76	84.73	28.2433
6	16.9	17.5	16.85	51.25	17.0833
7	18.36	21.66	17.55	57.57	19.19
8	17.34	14.91	21.66	53.91	17.97
9	17.77	19	15.89	52.66	17.5533
10	37.41	38.86	37.2	113.47	37.8233
11	16.09	20.03	14.96	51.08	17.0267
12	18.35	19.08	19.32	56.75	18.9167
13	27.23	24.37	29.82	81.42	27.14
14	34.48	36	35.84	106.32	35.44
15	24.13	25.18	25	74.31	24.77
16	38	41.04	40.54	119.58	39.86
17	20.31	21.57	18.35	60.23	20.0767
18	32.61	29.29	34.64	96.54	32.18
19	28.12	28.97	29.3	86.39	28.7967
20	20.52	20.19	21.95	62.66	20.8867
21	25.59	25.55	28.82	79.96	26.6533
22	32.36	32.49	30.35	95.2	31.7333
23	26.58	25.42	28.05	80.05	26.6833
24	22.02	21	20.89	63.91	21.3033
25	28.94	32.76	29.5	91.2	30.4
26	31.18	30.63	28.83	90.64	30.2133
27	35.17	34.32	36.18	105.67	35.2233
28	14.15	12.5	15.79	42.44	14.1467
29	36.08	36.82	37.16	110.06	36.6867
30	37.37	38.58	34.5	110.45	36.8167
31	27.6	22.85	31.75	82.2	27.4
32	40	41	39	120	40
33	18.63	17.61	17.18	53.42	17.8067
34	25.28	25.28	26.06	76.62	25.54
35	28.04	28	29	85.04	28.3467
36	38.44	38	39	115.44	38.48
37	33.58	34.43	32	100.01	33.3367
38	44.57	45	44	133.57	44.5233
39	38.07	38.46	37.5	114.03	38.01
40	40.81	39.59	41	121.4	40.4667
Total	1144.88	1155.54	1155.93	3456.35	1152.12

## Sheet: Grain Shape Before
R1	R2	R3	Total	Mean
2.20059	2.2439	2.23	6.67449	2.22483
2.49415	2.40571	2.46	7.35987	2.45329
2.33141	2.33791	2.41379	7.08312	2.36104
2.13896	2.2	2.23446	6.57343	2.19114
2.46914	2.27811	2.25926	7.0065	2.3355
2.26648	2.22	2.35714	6.84362	2.28121
2.48225	2.56098	2.67524	7.71847	2.57282
2.3	2.35714	2.30588	6.96303	2.32101
2.29855	2.34006	2.34036	6.97897	2.32632
2.30473	2.23988	2.3	6.84462	2.28154
2.29143	2.3	2.3142	6.90563	2.30188
2.43155	2.65015	2.35211	7.43382	2.47794
2.35	2.29888	2.37069	7.01957	2.33986
2.25683	2.36232	2.13243	6.75158	2.25053
2.57831	2.57764	2.5	7.65595	2.55198
2.44575	2.38244	2.48193	7.31011	2.4367
2.38372	2.27945	2.35	7.01317	2.33772
2.62857	2.63323	2.72697	7.98877	2.66292
2.31653	2.23077	2.3	6.8473	2.28243
2.63924	2.53355	2.53947	7.71226	2.57075
2.36752	2.3	2.42899	7.09651	2.3655
2.44272	2.27976	2.42262	7.14511	2.3817
2.24251	2.2	2.21196	6.65446	2.21815
2.2465	2.15789	2.16332	6.56772	2.18924
2.4221	2.39	2.42478	7.23688	2.41229
2.45988	2.53488	2.58824	7.583	2.52767
2.24355	2.24107	2.2	6.68462	2.22821
2.31818	2.18318	2.30267	6.80404	2.26801
2.19944	2.22284	2.09524	6.51752	2.17251
2.45	2.47	2.4	7.32	2.44
2.36571	2.44058	2.4136	7.21989	2.40663
2.11842	2.26593	2.17711	6.56146	2.18715
2.72256	2.82727	2.8	8.34983	2.78328
2.17333	2.22992	2.27457	6.67782	2.22594
2.52817	2.50178	2.5	7.52995	2.50998
2.23442	2.35241	2.18429	6.77112	2.25704
2.35207	2.3	2.31214	6.96421	2.3214
2.09456	2.07453	2.15647	6.32556	2.10852
2.44548	2.4	2.41877	7.26425	2.42142
2.31098	2.12275	2.17656	6.61029	2.20343
94.3463	93.9269	94.2953	282.568	94.1895

## Sheet: Grain Shape After
R1	R2	R3	Total	Mean
1.75	1.76	1.8	5.31	1.77
1.99	2.20069	1.98007	6.17076	2.05692
1.84667	1.93907	1.9	5.68573	1.89524
1.80066	1.7322	1.84138	5.37425	1.79142
1.83803	1.88889	1.8125	5.53942	1.84647
2.12915	2.02574	2.08014	6.23503	2.07834
2.0807	2.07692	2.0519	6.20953	2.06984
1.8	1.65994	1.76331	5.22326	1.74109
2.03846	1.9726	1.97535	5.98642	1.99547
1.83389	1.9854	1.87097	5.69026	1.89675
1.81081	1.9894	1.98577	5.78598	1.92866
2.01053	2	1.91228	5.92281	1.97427
2.10169	2.04659	1.95053	6.09882	2.03294
2.08014	1.92029	1.94077	5.9412	1.9804
2.1	2.1476	2.09455	6.34215	2.11405
1.97603	2.02518	1.94138	5.94259	1.98086
1.98962	1.96057	2.0947	6.04489	2.01496
2.06316	2.16912	2.19776	6.43004	2.14335
2.27413	2.17176	2.23723	6.68311	2.2277
2.1	2.14286	2.11969	6.36255	2.12085
2.01071	2.0037	1.93066	5.94507	1.98169
2.0605	2.08803	2.09701	6.24554	2.08185
2.09	2.26103	2.12727	6.4783	2.15943
2.13718	1.9798	2.20714	6.32412	2.10804
1.68166	1.7	1.80074	5.1824	1.72747
2.29707	2.20553	2.2	6.7026	2.2342
2.15357	1.94737	2.03125	6.13219	2.04406
2.04528	2.08627	2.11439	6.24595	2.08198
1.91519	1.96691	1.82069	5.7028	1.90093
2.09328	2.19679	1.84746	6.13753	2.04584
1.89189	1.99301	1.97966	5.86456	1.95485
1.97342	1.93182	1.99656	5.9018	1.96727
1.9868	1.76647	1.97482	5.72809	1.90936
2.4	2.24074	2.40076	7.0415	2.34717
2.14108	2.02128	1.95357	6.11593	2.03864
1.91786	1.84698	1.74035	5.50518	1.83506
1.79798	1.7549	1.87043	5.42331	1.80777
1.71044	1.7222	1.73548	5.16812	1.72271
1.70199	1.7	1.71654	5.11853	1.70618
1.71478	1.77509	1.7543	5.24416	1.74805
79.3344	79.0027	78.8494	237.186	79.0622

## Sheet: Days to heading
R1	R2	R3	Total	Mean
89.72	88.97	90.17	268.86	89.62
90.56	89.81	91.01	271.38	90.46
90.56	89.81	91.01	271.38	90.46
90.44	89.69	90.89	271.02	90.34
90.48	89.73	90.93	271.14	90.38
96.52	95.77	96.97	289.26	96.42
100	99.25	100.45	299.7	99.9
100	99.25	100.45	299.7	99.9
98.8	100.15	97.9	296.85	98.95
99.2	100.55	98.3	298.05	99.35
95.08	96.43	94.18	285.69	95.23
95.48	96.83	94.58	286.89	95.63
92.32	93.67	91.42	277.41	92.47
98	99.35	97.1	294.45	98.15
95.8	97.15	94.9	287.85	95.95
105	106.35	104.1	315.45	105.15
96	97.35	95.1	288.45	96.15
105	106.35	104.1	315.45	105.15
98	99.35	97.1	294.45	98.15
97	98.35	96.1	291.45	97.15
100	101.35	99.1	300.45	100.15
99	99.89	100.45	299.34	99.78
102	102.89	99.45	304.34	101.447
104	104.89	102.45	311.34	103.78
95	95.89	104.45	295.34	98.4467
97	97.89	95.45	290.34	96.78
100	100.89	97.45	298.34	99.4467
99	99.89	100.45	299.34	99.78
102	102.89	99.45	304.34	101.447
102	102.89	102.45	307.34	102.447
100	100.89	102.45	303.34	101.113
96	96.89	100.45	293.34	97.78
99	99.89	96.45	295.34	98.4467
105	105.89	99.45	310.34	103.447
101	99.75	102.35	303.1	101.033
92	90.75	93.35	276.1	92.0333
92	90.75	93.35	276.1	92.0333
109	107.75	110.35	327.1	109.033
108	106.75	109.35	324.1	108.033
105	103.75	106.35	315.1	105.033
3930.96	3946.58	3931.81	11809.4	3936.45

## Sheet: Plant Height
R1	R2	R3	Total	Mean
82	84	86	252	84
99	101	103	303	101
85	87	89	261	87
80	82	84	246	82
75	77	79	231	77
105	107	109	321	107
108	110	112	330	110
106	108	110	324	108
120	122	124	366	122
122	124	126	372	124
85	87	89	261	87
115	117	119	351	117
105	107	109	321	107
115	117	119	351	117
88	90	92	270	90
74	76	78	228	76
108	110	112	330	110
105	107	109	321	107
112	114	116	342	114
115	117	119	351	117
108	110	112	330	110
105	107	109	321	107
124	122	120	366	122
122	120	118	360	120
84	82	80	246	82
89	87	84	260	86.6667
90	96	94	280	93.3333
99	97	93	289	96.3333
95	95	90	280	93.3333
116	114	112	342	114
124	122	120	366	122
94	92	90	276	92
94	92	90	276	92
112	110	108	330	110
98	96	95	289	96.3333
99	97	97	293	97.6667
85	83	85	253	84.3333
114	112	114	340	113.333
91	89	90	270	90
91	86	85	262	87.3333
4038	4053	4070	12161	4053.67

[truncated: 7 more sheets: Panicle Plant, Panicle weight, Panicle length, Total grain panicle, Yield kg , Harvest index , Index]
